# 1 Field evaluation of biocontrol agents against black-foot and Petri 2 diseases of grapevine

3  
4  
5 **María del Pilar Martínez-Diz<sup>1,2</sup>, Emilia Díaz-Losada<sup>1</sup>, Marcos Andrés-Sodupe<sup>3</sup>, Rebeca  
6 Bujanda<sup>3</sup>, María Mercedes Maldonado-González<sup>3</sup>, Sonia Ojeda<sup>3</sup>, Amira Yacoub<sup>4</sup>, Patrice  
7 Rey<sup>4</sup>, David Gramaje<sup>3</sup>**

8  
9  
10 <sup>1</sup>Estación de Viticultura e Enología de Galicia (AGACAL-EVEGA), Ponte San Clodio s/n  
11 32428-Leiro-Ourense, Spain.

12 <sup>2</sup>Universidade da Coruña, Facultade de Ciencias, Zapateira, 15071 A Coruña, Spain.

13 <sup>3</sup>Instituto de Ciencias de la Vid y del Vino (ICVV), Consejo Superior de Investigaciones  
14 Científicas - Universidad de la Rioja - Gobierno de La Rioja, Ctra. LO-20 Salida 13, Finca La  
15 Grajera, 26071 Logroño, Spain.

16 <sup>4</sup>INRA, ISVV, UMR1065 SAVE, F-33140, Villenave d'Ornon, France.

17  
18 \* Correspondence to: D. Gramaje, Instituto de Ciencias de la Vid y del Vino (ICVV), Consejo  
19 Superior de Investigaciones Científicas, Universidad de la Rioja, Gobierno de La Rioja, Ctra.  
20 LO-20 Salida 13, 26007 Logroño, Spain.

21 E-mail: [david.gramaje@icvv.es](mailto:david.gramaje@icvv.es)

22

23

24

25

26

27

## 28 **ABSTRACT**

29

30 **BACKGROUND:** Black-foot and Petri diseases are the main fungal diseases associated with  
31 young grapevine decline. Two field experiments were established to evaluate the preventive  
32 effect of two potential biocontrol agents (BCAs), i.e. *Streptomyces* sp. E1 + R4 and *Pythium*  
33 *oligandrum* Po37, and three BCA-commercial products containing *Trichoderma atroviride*  
34 SC1, *Trichoderma koningii* TK7 and *Pseudomonas fluorescens*+*Bacillus atrophaeus* on fungal  
35 infection in grafted plants and plant growth parameters.

36

37 **RESULTS:** The effectiveness of some BCA in reducing the incidence and severity of both  
38 diseases was dependent on the plant part analyzed and the plant age. No single BCA application  
39 was able to control both diseases. *Streptomyces* sp. E1+R4 were able to reduce significantly  
40 black-foot disease infection while *P. oligandrum* Po37 and *Trichoderma* spp. were able to  
41 reduce significantly Petri disease infection. BCA treatments had no effect on the shoot weight,  
42 and root weight was significantly lower in all BCA treatments with respect to the control.

43

44 **CONCLUSIONS:** The combination of the disease-suppressive activity of two or more  
45 beneficial microbes in a biocontrol preparation is required to prevent infection by black-foot  
46 and Petri disease fungi in vineyards.

47

48 **Keywords:** *Bacillus*, grapevine trunk diseases, *Pseudomonas*, *Pythium*, *Streptomyces*,  
49 *Trichoderma*, *Vitis vinifera* L.

## 50 1 INTRODUCTION

51 Grapevine trunk diseases (GTDs) are one of the most damaging diseases affecting the grapevine  
52 industry in all grape-growing regions worldwide, being responsible for yield and productivity  
53 loss, and one of the main causes of an early vines death.<sup>1</sup> Among them, black-foot and Petri  
54 diseases are the two most common GTDs affecting planting material at nurseries, newly planted  
55 vines and young vineyards (<5 years old).<sup>2-4</sup> In La Rioja (northern Spain), the annual financial  
56 cost of the replacement of death plants cv Tempranillo in due to black-foot and Petri diseases  
57 is estimated to be 7.16 million €/year.<sup>5</sup> Field symptoms of black-foot and Petri diseases affected  
58 vines include overall stunting growth, delayed budbreak, retarded or absent sprouting,  
59 shortened internodes, chlorotic and sparse foliage with necrotic margins, leaves or entire shoots  
60 wilting, and dieback.<sup>3</sup> However, these symptoms also resemble those associated with abiotic  
61 disorders such as spring frost, winter damage and/or nutrient deficiency.<sup>1</sup> Characteristic  
62 symptoms of black-foot disease include dark brown and soft areas in roots and black  
63 discolouration and necrosis in the basal end of the rootstock.<sup>2</sup> Regarding Petri disease, dissected  
64 affected vines display brown and black vascular streaking, mainly in the rootstock, and  
65 gumming that turns dark when exposed to air.<sup>3</sup>

66 Up to 32 species of the genera *Campylocarpon*, *Cylindrocladiella*, *Dactylonectria*,  
67 *Ilyonectria*, *Neonectria*, *Pleiocarpon* and *Thelonectria* have been reported to cause black-foot  
68 disease,<sup>1,6-8</sup> *Dactylonectria torresensis* being the most prevalent species associated with diseased  
69 vines in Europe.<sup>9-11</sup> These fungal species are known to be soilborne and persist as mycelium  
70 and conidia in rotten root fragments or as resting spores (chlamydo-spores) that can survive in  
71 the soil for extended periods of time after infected plants are removed.<sup>4,12</sup> Apparently healthy  
72 plants placed in infested nursery soil can become infected through trunk wounds or roots, such  
73 as the incomplete callused rootstock end.<sup>2</sup>

74 The main fungal species associated with Petri disease is *Phaeomoniella (Pa.)*  
75 *chlamydospora*.<sup>13</sup> However, other fungal species that have also been isolated in relatively high  
76 frequencies from Petri diseased vines are 29 species of the genus *Phaeoacremonium*,  
77 *Pleurostoma richardsiae*, and 6 *Cadophora* spp.<sup>1</sup> Among those, *Phaeoacremonium (Pm.)*  
78 *minimum* and *Cadophora luteo-olivacea* are the most prevalent.<sup>13,14</sup> *Pa. chlamydospora* and  
79 *Phaeoacremonium* spp. can spend part of their disease cycle in soil as mycelium and conidia in  
80 infected rootstock wood, roots or pruning debris,<sup>15,16</sup> or chlamydo-spores in the case of *Pa.*  
81 *chlamydospora*.<sup>15</sup> The presence of *Cadophora* spp. in soils has been recently confirmed using  
82 ITS high-throughput amplicon sequencing (HTAS) approach.<sup>17</sup> Therefore, the main hypothesis  
83 is that these fungi could gain entry into the xylem of young plants at the nursery or newly  
84 established vineyards through root and/or basal end of the rootstock infections. In addition, they  
85 are also disseminated through the dispersion of airborne spores (conidia and/or ascospores) by  
86 rain, wind or arthropods until they land on susceptible and fresh pruning wounds.<sup>15</sup>

87 Presently, no curative measures are available to reduce the impact of these diseases once  
88 the vines are infected, making their management in the field difficult. Furthermore, the loss of  
89 the most effective preventative chemical products such as the banning in the early 2000s of  
90 sodium arsenite or benzimidazoles,<sup>18</sup> and the high current restrictions and difficulties that  
91 chemicals are facing in most countries around the world because of the risks for human health  
92 and the environment,<sup>19,20</sup> increase even more the complexity of their control. Nowadays, the  
93 best way to handle these diseases is by using an Integrated Pest Management (IPM) strategy<sup>21</sup>  
94 where several strategies are combined to reduce GTDs infections, such as the use of physical  
95 (e.g. hot-water treatment), biological (e.g. antagonist microorganisms) and cultural practices  
96 (e.g. crop management, irrigation, soil preparation, etc.), throughout the nursery mother blocks  
97 and newly planted vineyards.<sup>1</sup>

98 Investigation of BCAs able to prevent or at least reduce the development of GTDs are  
99 considered a research priority.<sup>1</sup> In fact, over the last 10 years there has been a frantic search by

100 the GTDs research community for microbial antagonists, including fungi,<sup>21-33</sup> bacteria,<sup>29,34-40</sup>  
101 and oomycetes.<sup>41,42</sup> Although some of these studies provided promising findings, the results  
102 have not been consistent, observing differences in efficacy depending on the nature of the BCA,  
103 the target pathogen, application method, time of exposure to the BCA and even the grapevine  
104 cultivars and rootstocks subjected to study. In addition, most of these studies have been  
105 performed so far under *in vitro* laboratory,<sup>26,29,31,32,34-40</sup> greenhouse<sup>29,31,32,35-37,41,42</sup> or nursery<sup>21-</sup>  
106 <sup>25,28,33,38</sup> controlled conditions by using rootstock or scion cuttings.

107 Three *Trichoderma*-based biological products are currently registered in Spain for the  
108 preventive protection of pruning wounds against GTD fungi, namely Esquive® (*Trichoderma*  
109 *atroviride* I-1237), Blindar® (*Trichoderma asperellum* ICC012 + *Trichoderma gamsii*  
110 ICC080) and Vintec® (*T. atroviride* SC1).<sup>43</sup> Only Vintec® has been additionally registered to  
111 control Petri disease pathogens in grapevine grafted nursery stock.<sup>43</sup> Therefore, we propose to  
112 apply registered BCA products in Spain for control of GTD fungi both on grapevine and/or  
113 other hosts, and other potential BCAs as a preventive strategy in pre- and post-planting. The  
114 main objectives of this study were: (i) to evaluate the effectiveness of several BCA root  
115 treatments under field conditions in reducing natural infections of fungal pathogens associated  
116 with black-foot and Petri diseases over two growing seasons, and (ii) to assess the BCA root  
117 treatments influence in plant growth parameters.

118

## 119 2 MATERIALS AND METHODS

120

### 121 2.1. Planting material

122 One-year old grapevine grafted plants of ‘Tempranillo’/110 Richter combination with uniform  
123 root distribution were obtained from a commercial nursery in Spain and used in this experiment.  
124 Roots were trimmed to 10 cm length and dormant plants were hot-water treated at 53°C for 30  
125 min to reduce any existing infections by black-foot and Petri disease pathogens<sup>44,45</sup> and then  
126 acclimatized for 24 h at 20°C before biological control agents (BCA) inoculation.

127

### 128 2.2. Grafted plants inoculation and experimental design

129 Hot-water treated plants were inoculated by dipping the roots and the basal part of the plants  
130 for 24 h at room temperature with 25 l water suspensions of the following treatments: (T1)  
131 *Streptomyces* sp. E1 + R4 (1.35 x 10<sup>9</sup> CFU ml<sup>-1</sup>) at 7.5 ml l<sup>-1</sup>, (T2) *Trichoderma koningii* TK7  
132 (Condor Shield®, ATENS; 1 x 10<sup>9</sup> CFU g<sup>-1</sup> formulated product) at 2 g l<sup>-1</sup>, (T3) *T. atroviride*  
133 SC1 (Vintec®, Belchim Crop Protection; 2 x 10<sup>10</sup> CFU g<sup>-1</sup> formulated product) at 2 g l<sup>-1</sup>, (T4)  
134 *Pseudomonas fluorescens* + *Bacillus atrophaeus* (Stilo Cruzial®, SIPCAM Iberia; 1x 10<sup>8</sup> CFU  
135 g<sup>-1</sup> formulated product) at 2 g l<sup>-1</sup>, (T5), *Pythium oligandrum* Po37 (Biovitis, France; 1.28 x 10<sup>6</sup>  
136 CFU g<sup>-1</sup>) at 2 g l<sup>-1</sup>, and (C) water as untreated control. We selected T1 and T5 due to the  
137 previously demonstrated efficacy against GTD fungi in young vines.<sup>38,41</sup> T2 and T4 are not  
138 registered as a phytosanitary product in Spain yet. The viability of the *Trichoderma* conidia in  
139 the products T2 and T3 was checked to be at a minimum of 85% before the trial, as described  
140 by Pertot *et al.*<sup>28</sup>

141

142 Inoculated grafted plants were immediately planted in May 2017 in two field sites located  
143 in Logroño (La Rioja, Spain). Both fields were under grapevine nursery planting material  
144 rotation, which is very common in the area of study. Standard cultural practices were used in  
145 both sites during the grapevine growing season. The plant groups (40 plants) were spaced 100  
146 cm from other groups, plants being 30 cm apart from center to center. Each field plot was 12 m  
147 long and included 24 rows, each with a plant group of 40 plants (960 plants per field). In both  
148 sites, the experimental design consisted of four randomized blocks, each containing a plant  
group (40 plants) of each treatment (160 plants per treatment), with 200 cm between each block.

149 Plots were less than 1 km apart and had very similar climates. Soil samples were taken for  
150 physicochemical properties analysis as described below. A drip irrigation system was laid on  
151 the soil of each row. An additional stock of 50 grafted plants was used to check for their  
152 phytosanitary status immediately after hot-water treatment (HWT).

153

### 154 **2.3. GTD fungal isolation and identification**

155 In February 2018, once grafted plants had completed their cycle of vegetative growth and were  
156 in a dormant state, 50% of the 2-year-old plants in each field were carefully dug out from the  
157 soil to keep the root system intact and taken back to the laboratory for immediate processing.  
158 In order to isolate black-foot and Petri disease pathogens, two plant parts were evaluated, roots  
159 and the basal ends of the rootstocks. Root necrotic sections from 2-3 cm near the basal end of  
160 the rootstock and wood sections of 3 cm length of the basal end of the rootstock were cut,  
161 washed under running tap water, surface sterilized in 33% sodium hypochlorite (commercial  
162 40 g Cl/l) for 1 min and rinsed twice with sterile distilled water. Five small root or xylem pieces  
163 were plated on Malt Extract Agar (MEA) supplemented with 0.35 g l<sup>-1</sup> of streptomycin sulphate  
164 (Sigma-Aldrich, St. Louis, MO, USA) (MEAS). Four MEAS plates were used per plant (two  
165 per plant part). Plates were incubated for 10-15 days at 25 °C in the dark and all colonies were  
166 transferred to Potato Dextrose Agar (PDA). Isolates were single-spored prior to morphological  
167 and molecular identification with the serial dilution method.<sup>46</sup>

168 In May 2018, the remaining 50% of the plants in each field were drip inoculated with all  
169 treatments (0.5 l per plant using the same inoculum concentration as described above). In  
170 February 2019, these 3-year-old plants were carefully dug out and processed for fungal isolation  
171 as described above. All planting material was washed and also assessed for undried shoot and  
172 total root weight. The disease incidence (DI) of black-foot and Petri disease pathogens was  
173 determined as the mean percentage of grafted plants that was infected by these fungi. The  
174 disease severity (DS) in infected grafted plants was determined as the mean percentage of root  
175 or wood segments (ten segments per plant each) that was colonized by these fungi. The presence  
176 of *Trichoderma* spp. was also recorded to provide an indication of the extent of colonization  
177 following treatment with the *Trichoderma* formulations (T2 and T3). The stock of 50 plants  
178 was also analysed after HWT as described before.

179 Fungal isolates resembling black-foot and Petri disease pathogens were identified by  
180 molecular techniques. For DNA extraction, 300 mg of fungal mycelium and conidia from single  
181 spore isolates grown on PDA for 2 to 3 weeks at 25°C in the dark were scraped and  
182 homogenised twice in a Fastprep®-24 tissue homogenizer (MP Biomedicals, USA). Total DNA  
183 was extracted using the E.Z.N.A. Plant Miniprep Kit (Omega Bio-tek, Doraville, USA)  
184 following manufacturer's instructions. DNA was visualized on 1% agarose gels stained with  
185 RedSafe (iNtRON Biotechnology, Lynnwood, WA, USA). DNA was stored at -20°C. Black-  
186 foot species were identified by sequencing part of the histone gene (*his3*) using CYLH3F and  
187 CYLH3R primers.<sup>47-49</sup> The identification of *Pa. chlamydospora* isolates was performed by  
188 analysis of the ITS region of DNA amplified using the fungal primers Pch1/Pch2.<sup>50</sup> *Pm.*  
189 *minimum* and *C. luteo-olivacea* were identified by sequence analysis of the β-tubulin (*tub2*)  
190 using the primer pairs T1<sup>51</sup> and Bt2b<sup>52</sup> for *Phaeoacremonium*, and BTCadF/BTCadR<sup>53</sup> for  
191 *Cadophora*. *Trichoderma* spp. were isolated on MEAS and identified at species level by  
192 sequencing the ITS region using the universal primers ITS1F/ITS4.<sup>54</sup> *P. oligandrum* was  
193 isolated on Corn Meal Agar added with Pimaricin, Ampicillin, Rifampicin and  
194 Pentachloronitrobenzene (CMA-PARP) and identified by morphological features.<sup>41</sup>  
195 Polymerase chain reaction (PCR) products were purified with the High Pure PCR Product  
196 Purification Kit (Roche Diagnostics, Mannheim, Germany), and sequenced in both directions

197 by Macrogen Inc. (Seoul, Republic of Korea). The sequences obtained were then blasted in  
198 GenBank.

199

#### 200 **2.4. Soil physicochemical properties analysis**

201 Four soil cores were collected to a depth of 20 cm from each field and bulked into a single soil  
202 sample per field. Samples were mixed well, air-dried for one week and sieved (2-mm to 5-mm  
203 mesh size) prior to soil physicochemical analyses. Soil samples were tested for electric  
204 conductivity (EC) in water and pH with a soil solution ratio of 1:5, soil texture by laser  
205 diffraction particle size (Diffractometer LS 13 320, Beckman Coulter Inc., Brea, Calif.), soil  
206 organic matter (SOM) by dichromate oxidation,<sup>55</sup> cation exchange capacity (CEC) by the  
207 cobaltihexamine method,<sup>56</sup> carbonate total by infrared (Equilab CO-202; Equilab, Jakarta,  
208 Indonesia), assimilable magnesium and calcium by inductively coupled plasma (ICP)  
209 spectroscopy (ARL-Fison 3410, USA) and the cobaltihexamine method and P, K, S, Mg, Mn,  
210 Fe, Ca and Na by ICP and Mehlich method.<sup>57</sup> Analyses were conducted in the official Regional  
211 Laboratory of La Grajera (Logroño, Spain) in April 2017, before the beginning of the  
212 experiment.

213

#### 214 **2.5. Data analysis**

215 Prior to statistical analyses, data were checked for normality and homogeneity of variances, and  
216 transformed when needed. Percentage data were transformed into arcsin (DI or DS/100)<sup>1/2</sup>.  
217 Each treatment means (DI, DS, root and shoot weights) was calculated from the corresponding  
218 values in each sampling moment. The statistical analysis of the experimental results was carried  
219 out in a two-way ANOVA with blocks and treatments as independent variables, and the  
220 following dependent variables: DI (%), DS (%), root weight (g) and shoot weight (g). In the 3-  
221 year-old plants, the percentage of reduction (PR) of the fungal pathogen detection at each  
222 isolation plant part and for each fungal GTD species was calculated as  $PR = 100(PC - PT)/PC$ ,  
223 where PC is the mean pathogen incidence or severity in the control and PT is the mean pathogen  
224 incidence or severity in the BCA treatment. Means were compared by the Student's *t* least  
225 significant difference (LSD) at  $P < 0.05$ . Soil physicochemical variables were subjected to  
226 analyses of variance. LSD test was calculated to compare variable means. Data from all  
227 experiments were analysed using the Statistix 10 software (Analytical Software).

228

### 229 **3 RESULTS**

230

#### 231 **3.1 Plant viability and fungal identification**

232 None of the treatments had a negative influence on callus or initial shoot growth. The viability  
233 of planting material was estimated to be of 94% and 92% for the 2-year-old and 3-year-old  
234 plants at the end of growing season, respectively. After HWT, six and four out of the 50 grafted  
235 plants stock tested positive for *Diplodia seriata* and *Neofusicoccum parvum*, respectively, other  
236 fungi associated with GTDs. No black-foot and Petri disease pathogens were isolated from hot-  
237 water treated plants. In the 2-year-old plants, a total of 1,650 Petri disease (83.6% from the  
238 basal end of the rootstock and 16.4% from roots) and 896 black-foot disease pathogens (15.8%  
239 from the basal end of the rootstock and 84.2% from roots) isolates were collected. Petri disease  
240 pathogens were identified as *C. luteo-olivacea* (57.8%), followed by *Pa. chlamydospora*  
241 (27.3%) and *Pm. minimum* (14.9%).

242 Black-foot pathogens were identified as *Dactylonectria torresensis* (66.4%), followed by  
243 *Dactylonectria macrodidyma* (22.6%), *Ilyonectria liriodendri* (6.2%) and *Dactylonectria*  
244 *alcacerensis* (4.8%). In the 3-year-old plants, a total of 1,825 Petri disease (89.4% from the  
245 basal end of the rootstock and 10.6% from roots) and 1,632 black-foot pathogens (26.9% from  
246 the basal end of the rootstock and 73.1% from roots) isolates were collected. Petri disease

247 pathogens were identified as *C. luteo-olivacea* (54.6%), followed by *Pa. chlamydospora*  
248 (31.1%) and *Pm. minimum* (14.3%). Black-foot pathogens were identified as *D. torresensis*  
249 (66.0%), followed by *I. liriodendri* (16.0%), *D. macrodidyma* (9.2%), *Ilyonectria robusta*  
250 (4.4%), *D. alcacerensis* (2.5%) and *Ilyonectria pseudodestructans* (1.8%). Representative  
251 black-foot and Petri diseases isolate sequences obtained in this study were deposited to  
252 GenBank (Supplementary Table S1).

253 *Trichoderma atroviride* was isolated from 30 and 22% of the 2-year-old and 3-year-old  
254 plants, respectively. *Trichoderma koningii* was isolated from 12 and 18% of the 2-year-old and  
255 3-year-old plants, respectively. Our attempts to isolate *P. oligandrum* were unsuccessful.

### 256 257 **3.2 Disease incidence and disease severity in grafted plants**

258 Neither field site, nor block, nor its interaction significantly affected the DI and DS ( $P>0.05$ ,  
259 ANOVA not shown). Therefore, data from both field sites were combined and analysed  
260 together. There was a significant effect of treatment on mean Petri disease incidence values in  
261 the roots and the basal ends for both 2-year-old and 3-year-old plants (Table 1). In the 3-year-  
262 old plants, percentage of infected plants (DI) in the basal ends were significantly lower in  
263 treatments with *T. atroviride* SC1 (T3) ( $40.2\% \pm 8.3$ ) than in the control treatment ( $61.5\% \pm$   
264  $5.6$ ) (Figure 1A). In both 2-year-old and 3-year-old plants, percentage of infected plants (DI) in  
265 the roots were significantly lower in treatments with *P. oligandrum* Po37 (T5) (2-year-old  
266 plants:  $7.5\% \pm 1.4$ , and 3-year-old plants:  $4.8\% \pm 1.3$ ) than in the control treatment (2-year-old  
267 plants:  $23.1\% \pm 2.8$ , and 3-year-old plants:  $18.3\% \pm 3.9$ ) (Figure 1B). Biocontrol treatments had  
268 a significant effect on mean Petri disease severity in basal ends of 2-year-old plants, and in roots  
269 and basal ends for 3-year-old plants (Table 1). *T. atroviride* SC1 (T3) in the 2-year-old plants  
270 ( $19.4\% \pm 1.4$ ) and both *Trichoderma* spp. treatments (T2:  $25.5\% \pm 2.5$ , and T3:  $25.8\% \pm 2.3$ )  
271 in the 3-year-old plants significantly reduced the percentage of DS in the basal ends compared  
272 to the control treatment (2-year-old plants:  $36.1\% \pm 4.3$ , and 3-year-old plants:  $39.5\% \pm 4.9$ )  
273 (Figure 1A). *Trichoderma* spp. treatments (T2:  $9.1\% \pm 1.3$ , and T3:  $10.8\% \pm 1.8$ ) resulted in  
274 significant lower DS in roots of the 3-year-old plants than the control treatment ( $16.8\% \pm 3.8$ )  
275 (Figure 1B).

276 Analysis of variance showed no significant effect of biocontrol treatments on black-foot  
277 disease incidence and severity in roots of both 2-year-old and 3-year-old plants (Table 1). There  
278 was a significant effect of treatment on mean black-foot disease incidence values in the basal  
279 ends for both 2-year-old and 3-year-old plants (Table 1). In the 2-year-old plants, all treatments  
280 resulted in significant lower DI in the basal ends than the control treatment (Figure 2A). In the  
281 3-year-old plants, percentage of infected plants (DI) in the basal ends were significantly lower  
282 in treatments with *Streptomyces* sp. E1 + R4 (T1) ( $4.8\% \pm 2.1$ ) than in the control treatment  
283 ( $13.2\% \pm 3.2$ ) (Figure 2A). There was a significant effect of treatment on mean black-foot  
284 disease severity values in the basal ends of 2-year-old plants (Table 1). *Streptomyces* sp. E1 +  
285 R4 (T1) ( $10.0\% \pm 2.3$ ) significantly reduced the percentage of DS in the basal ends compared  
286 to the control treatment ( $19.1 \pm 0.8$ ) (Figure 2A).

### 287 288 **3.3 Fungal species incidence and severity in grafted plants**

289 Considering the fungal species within each disease individually, *P. oligandrum* Po37 (T5) and  
290 *T. atroviride* SC1 (T3) significantly reduced the DI of *C. luteo-olivacea* in the roots and the  
291 basal ends, respectively, of 2-year-old plants compared to the control treatment ( $P<0.05$ ,  
292 ANOVA not shown) (Table 2). Percentage of DI in the roots of both 2-year-old and 3-year-old  
293 plants, and DS in the roots of 2-year-old plants caused by *Pa. chlamydospora* were significantly  
294 lower in treatments with *P. oligandrum* Po37 (T5) than in the control treatment ( $P<0.05$ ,  
295 ANOVA not shown) (Table 2). In the 3-year-old plants, *T. atroviride* SC1 (T3) significantly

296 reduced both DI and DS caused by *Pa. chlamydospora* in the basal ends compared to the control  
297 treatment ( $P<0.05$ , ANOVA not shown) (Table 2). Both *T. koningii* TK7 (T2) and *P.*  
298 *fluorescens* + *B. atrophaeus* (T4) treatments resulted in significant lower DI caused by *Pm.*  
299 *minimum* in the roots of 2-year-old plants than the control treatment ( $P<0.05$ , ANOVA not  
300 shown) (Table 2). Furthermore, *T. koningii* TK7 (T2) treatment resulted in significant lower DS  
301 caused by *Pm. minimum* in the roots of 3-year-old plants than the control treatment ( $P<0.05$ ,  
302 ANOVA not shown) (Table 2). *T. atroviride* SC1 (T3) significantly reduced the DS of *Pm.*  
303 *minimum* in the roots of both 2-year-old and 3-year-old plants compared to the control treatment  
304 ( $P<0.05$ , ANOVA not shown) (Table 2).

305 Regarding black-foot pathogens, all treatments significantly reduced the DI of *D.*  
306 *torresensis* and *D. macrodidyma* in the basal ends of 2-year-old plants compared to the control  
307 treatment ( $P<0.05$ , ANOVA not shown) (Table 3). *Streptomyces* sp. E1 + R4 (T1) significantly  
308 reduced *D. torresensis* DS in the basal ends of 2-year-old plants and DI in the basal ends of 3-  
309 year-old plants compared to the control treatment ( $P<0.05$ , ANOVA not shown) (Table 3). In  
310 both the 2-year-old and 3-year-old plants, percentages of DI in the roots and DS in the basal  
311 ends caused by *D. macrodidyma* were significantly lower in treatments with *Streptomyces* sp.  
312 E1 + R4 (T1) than in the control treatment ( $P<0.05$ , ANOVA not shown) (Table 3). *T. atroviride*  
313 SC1 (T3) also resulted in significant lower DS in the basal ends of 3-year-old plants than the  
314 control treatment ( $P<0.05$ , ANOVA not shown) (Table 3). Low levels of *Trichoderma* spp.  
315 ( $<30\%$ ) were isolated from roots and basal ends of 2-year-old and 3-year-old plants subjected  
316 to T2 and T3 treatments in both fields.

317 The percentage of reduction (PR) was calculated for treatments statistically different from  
318 the control in the 3-years-old plants (Table 4). In roots, *P. oligandrum* Po37 (T5) provided  
319 93.6% disease incidence reduction of *Pa. chlamydopora*. On *Trichoderma* spp. treated plants,  
320 there was a reduction in *Pm. minimum* severity when compared with untreated controls, which  
321 ranged from 80% for *T. koningii* TK7 (T2) and 69.6% for *T. atroviride* SC1 (T3). In the basal  
322 ends, *T. atroviride* SC1 (T3) provided 69.4% disease incidence and 56.6% disease severity  
323 reduction of *Pa. chlamydopora*, while *T. koningii* TK7 (T2) provided 52.3% disease severity  
324 reduction of *Pm. minimum*. None of the BCA treatments statistically reduced the disease  
325 incidence and severity of black-foot disease fungi in roots (Tables 3 and 4). In the basal ends,  
326 *Streptomyces* sp. E1 + R4 (T1) reduced the incidence of *D. torresensis* and the severity of *D.*  
327 *macrodidyma* by 89.1 and 100%, respectively. *T. atroviride* SC1 (T3) provided 100% disease  
328 severity reduction of *D. macrodidyma*.

329  
330 **3.4 Root and shoot weights in grafted plants, and physicochemical properties of the soil**

331 Analysis of variance showed no significant effect of biocontrol treatments on the shoot weight  
332 of 3-year-old plants ( $P>0.05$ , ANOVA not shown) (Figure 3). Mean shoot weight ranged from  
333 55.3 g  $\pm$  5.7 (T3) to 64.9 g  $\pm$  8.2 (T2). Biological control treatments had a significant effect on  
334 the root weight of 3-year-old plants ( $P<0.05$ , ANOVA not shown) (Figure 3). Mean root weight  
335 ranged from 41.9 g  $\pm$  3.7 (T3) to 52.9 g  $\pm$  2.9 (C). All treatments resulted in significant lower  
336 root weight than the control treatment (Figure 3). Analyses of variance indicated no significant  
337 differences for the soil physicochemical properties between fields ( $P>0.05$ , ANOVA not  
338 shown).

#### 339 340 **4 DISCUSSION**

341  
342 This study represents the first approach to evaluate the effectiveness of different antagonistic  
343 microorganisms (bacteria, fungi and an oomycete) applied preventively to control black-foot  
344 and Petri diseases under field conditions. The use of BCA against soilborne pathogens are on  
345 the forefront of research; however, most experiences are on a laboratory scale, thus avoiding

346 the problems related to the production of large quantities of antagonists and their formulations,  
347 and disease control trials are performed in simplified environment such as growth chambers or  
348 experimental greenhouses, thus avoiding the risk of large-scale experiments in the field.

349 In this study, Petri disease infection was mainly detected in the basal ends of the rootstock,  
350 while fungi associated with black-foot disease were most frequently isolated from roots. *D.*  
351 *torresensis* was the most frequent isolated species (>60%) associated with black-foot disease at  
352 both plant ages. This agrees with previous research carried out on black-foot in Europe.<sup>9-11</sup>  
353 Regarding Petri disease, more than 80% of the fungi were identified as *C. luteo-olivacea* and  
354 *Pa. chlamydospora* at both plant ages. Both fungal species were frequently isolated from  
355 nursery stock and young vines worldwide.<sup>3</sup>

356 In our specific pathosystems, the effectiveness of some BCA in reducing the incidence and  
357 severity of both diseases under field conditions were dependent on the plant part analysed and  
358 the plant age. *Streptomyces* sp. E1 + R4 treatment was highly effective in reducing black-foot  
359 disease incidence at both plants ages and the severity of 2-year-old plants in the basal ends.  
360 However, the effect of these actinobacteria against Petri disease pathogens after 2 years in the  
361 field was very low. In contrast, Álvarez-Pérez *et al.*<sup>38</sup> evaluated the effectiveness of these  
362 bacterial strains individually, previously isolated from the endo- (strain E1) and rhizosphere  
363 (strain R4) of the grapevine root system, for black-foot and Petri diseases control in 1-year-old  
364 grafted plants under field conditions by partially immersing the grafts (up to 10 cm depth) in a  
365 rooting hormone solution containing the actinobacteria for 24 h at room temperature. They  
366 found significant reductions of the infection rates at the lower end of the rootstock of the fungal  
367 pathogens *Dactylonectria* sp., *Ilyonectria* sp., *Pm. minimum* and *Pa. chlamydospora*.<sup>38</sup> These  
368 differences in the effectiveness of the bacteria against Petri disease between experiments could  
369 be due to the commonly unpredictably behaviour of BCA when tested in different  
370 environments.<sup>58</sup>

371 Other bacterial treatment tested in our study was a commercial product containing  
372 *Pseudomonas fluorescens* and *Bacillus atrophaeus*. No biocontrol effect of this treatments was  
373 observed on fungal pathogens associated with black-foot and Petri diseases. Despite this fact,  
374 some strains of these bacterial species have been previously reported as plant growth-promoting  
375 bacteria (PGPB) and have been found to be potential BCA of plant diseases in several crops.<sup>59-</sup>  
376 <sup>62</sup> In grapevine, different *P. fluorescens* strains were identified as prospective new BCA against  
377 *Botrytis cinerea*<sup>63</sup> and to induce systemic resistance against *Plasmopara viticola* and *B. cinerea*  
378 by priming common and distinct defensive pathways.<sup>64</sup>

379 The *in vitro* effects of beneficial bacteria in reducing GTDs has been also tested.<sup>65,66</sup>  
380 *Bacillus subtilis* AG1 showed promising in reducing the growth of *Lasiodiplodia theobromae*,  
381 *Pa. chlamydospora*, and *Pm. minimum* in an artificial culture medium.<sup>34</sup> Rezgui *et al.*<sup>37</sup> recently  
382 identified antagonistic traits against GTDs pathogens of several *B. subtilis* strains inhabiting the  
383 wood tissues of mature grapevines in Tunisia. The antagonistic activity of *Pantoea*  
384 *agglomerans* and *Bacillus pumilus* against *N. parvum* and *Pa. chlamydospora* was  
385 demonstrated in inoculated ungrafted grapevine cuttings.<sup>35,36</sup> A recent study performed by  
386 Trotel-Aziz *et al.*<sup>40</sup> highlighted the effect of *B. subtilis* strain PTA-271 to efficiently attenuate  
387 the characteristic Botryosphaeria dieback symptoms caused by *N. parvum*.

388 Most studies on biological control of GTDs have examined the application of *Trichoderma*  
389 spp. in grapevine nurseries and young vineyards.<sup>21-25,29</sup> In our study, we individually evaluated  
390 two *Trichoderma*-based products containing *T. koningii* strain TK7 and *T. atroviride* strain  
391 SC1. A certain effect was observed in reducing *Pm. minimum* disease incidence for 2-year-old  
392 plants and disease severity for 3-year-old plants at the root level by *T. koningii* TK7 treatment.  
393 Little information is still available related to the biocontrol effect of TK7 strain to combat  
394 plants' fungal pathogens. Howell *et al.*<sup>67</sup> showed that the application of *T. koningii* TK7 to  
395 cotton seeds before planting was ineffective to control cotton seedlings damping-off in



396 artificially *Rhizoctonia solani*-infested cotton field soil flats. Other strains of this species have  
397 been recently reported as potential BCA for fungal pathogens in different crops, such as  
398 *Fusarium oxysporum* f. sp. *melonis* in melon<sup>68</sup> or *Sclerotium rolfsii* in groundnut.<sup>69</sup>

399 *Trichoderma atroviride* SC1 was effective in reducing *Pa. chlamydospora* disease  
400 incidence and severity in the basal ends of 3-year-old plants. In accordance with our results, a  
401 study carried out in Spain by Berbegal *et al.*<sup>33</sup> also found reductions in the incidence and  
402 severity of *Pa. chlamydospora* and *Pm. minimum* when analysed the rootstock basal end and  
403 root system of 1-day *T. atroviride* SC1 inoculated grafted plants in nurseries. In the same study,  
404 Berbegal *et al.*<sup>33</sup> also evaluated the effect of *T. atroviride* SC1 treatment in two fields during  
405 two growing seasons. The basal parts of the treated plants were soaked for 1 h in a *T. atroviride*  
406 SC1 suspension before planting, observing no BCA effect on incidence and severity of black-  
407 foot disease associated pathogens and significant reductions on pathogens associated with Petri  
408 disease at both fields after the first growing season. In Italian grapevine nurseries, the  
409 application of *T. atroviride* strain SC1 at several stages of the nursery process (pre-storage and  
410 pre-grafting hydration, stratification, callusing, and rooting) protected plants from infection by  
411 *Pm. minimum* and *Pa. chlamydospora* after a single artificial inoculation with both pathogens  
412 following the grafting stage.<sup>28</sup>

413 Regarding *P. oligandrum* Po37 treatment, a significant reduction of Petri disease incidence  
414 and severity was observed in 2-year-old plants and disease incidence in 3-year-old plants, at  
415 roots level. Yacoub *et al.*<sup>41</sup> reported a significant reduction in necrosis length caused by *Pa.*  
416 *chlamydospora* when the roots of ‘Cabernet Sauvignon’ cuttings were colonized by different  
417 *P. oligandrum* strains. The efficacy of *P. oligandrum* strain Sto7 in reducing the necrosis length  
418 caused by *N. parvum* and *Pa. chlamydospora* was demonstrated on grafted young ‘Cabernet  
419 Sauvignon’ vines cultivated in a nursery greenhouse, separately or in combination with two  
420 bacterial strains previously isolated from vineyards.<sup>42</sup> The ability of *P. oligandrum* strain Po37  
421 to act as an inducer of plant systemic resistance against pathogens is thought to be due to the  
422 presence of three elicitor-like proteins in its genome.<sup>70</sup>

423 Diverse formulations (dry or water suspensions), application methods and times of  
424 exposure of plants to BCA have been tested in the different studies carried out to assess the  
425 biocontrol potential of antagonist microorganisms.<sup>28,30,33,38,41,42,71-73</sup> In our assay, a 24-h soaking  
426 of the trimmed root systems and the basal end of the plants in BCA water suspensions was  
427 carried out before planting, but the percentage of *Trichoderma* spp. recovery was low in all  
428 cases (<30%). In this sense, Halleen *et al.*<sup>74</sup> were also able to only isolate a 2.3% of  
429 *Trichoderma* spp. from the basal ends of the rootstock and none from roots of grafted plants  
430 subjected to *Trichoderma* treatments, applied by dipping the basal ends of the rootstock for 1  
431 min before planting, after 7 months in a nursery field. In a recent study, González-García *et*  
432 *al.*<sup>72</sup> evaluated the colonization efficiency of *Streptomyces* sp. in the root system by comparing  
433 two inoculation methods, plant immersion in a bacterial suspension or direct injection of the  
434 bacterial suspension into the vegetal tissues and concluded that both methods allowed effective  
435 BCA colonization. This is also in accordance with Berbegal *et al.*<sup>33</sup> who used 24-h soak in *T.*  
436 *atroviride* SC1 water suspension to inoculate 110R rootstock cuttings before grafting, with  
437 percentages of recovery over 80% at both nursery and vineyard experiments. Van Jaarsveld *et*  
438 *al.*<sup>73</sup> evaluated different methods of application of *T. atroviride* on commercially planted  
439 nursery vines and concluded that dipping of basal ends in the *Trichoderma* dry formulation  
440 consistently gave higher colonization percentages than the 1-h soak of bases of vines before  
441 planting or *Trichoderma* field drenching. Further research is needed to evaluate the  
442 effectiveness of soaking vines in *T. koningii* TK7 or *T. atroviride* SC1 dry formulations  
443 compared to soaking vines for 24-h in BCA water suspensions before planting.

444 Biological control agent treatments did not affect the shoot weight, and root weight was  
445 significantly lower for all BCA treatments with respect to the untreated control at the end of the

446 second growing season (3-year-old plants). The impact of BCA treatments on grapevine  
447 development was very variable on previous research.<sup>29,73,74</sup> *Trichoderma* spp. and *B. subtilis*-  
448 based treatments resulted in lower mean root and shoot dry weight values when compared with  
449 the negative controls.<sup>29</sup> Nevertheless, Halleen *et al.*<sup>74</sup> found that none of the *Trichoderma*  
450 formulations tested yielded plants with roots or shoots mass significantly different than the  
451 water treated controls. Berbegal *et al.*<sup>33</sup> observed a significantly higher undried shoot weight  
452 for *T. atroviride* SC1 treated plants at the end of the first growing season, but this effect was  
453 not observed in the second growing season. Likewise, the application of actinobacteria to  
454 grafted grapevine plants did not show a significant effect, either positive or negative, on plants  
455 growth.<sup>38</sup> In contrast, Fourie *et al.*<sup>22</sup> observed that *T. harzianum* treatments significantly  
456 improved root development but not shoot mass in comparison with the control vines in  
457 nurseries. Several studies indicate that BCA treatments can enhance the growth of other crops,  
458 such as tomato<sup>75</sup> or rice.<sup>76</sup> All this variability could be related to the lack of proper long-standing  
459 implantation by these antagonist microorganisms in grapevine roots or the vigour level of the  
460 rootstock cultivar tested. BCA are living organisms whose activities depend mainly on the  
461 different physicochemical environmental conditions to which they are subjected,<sup>77</sup> and the  
462 greatest long-term effects probably occur with rhizosphere-competent strains with the ability to  
463 colonize and grow in association with plant roots.<sup>78</sup>

464

## 465 5 CONCLUSIONS

466

467 This study highlighted the potential of some BCA to reduce GTD infection under field  
468 conditions. No single BCA application was able to control both diseases. Further studies should  
469 evaluate the combination of the disease-suppressive activity of two or more beneficial  
470 microbiomes in a biocontrol preparation against black-foot and Petri diseases. Our results also  
471 open up the possibility to combine the application of BCA as a pre-planting strategy with other  
472 measures in an Integrated Pest Management (IPM) programme against GTDs. For example,  
473 BCA can be applied after hot-water treatment (HWT) of dormant grafted plants or after soil  
474 biofumigation. In this regard, recent research highlighted the effectiveness of HWT at 53°C for  
475 30 min<sup>45</sup> and white mustard biofumigation<sup>30</sup> to reduce GTD incidence in planting material and  
476 grapevine nursery soil, respectively.

477

## 478 ACKNOWLEDGEMENTS

479

480 We thank researchers of the “Instituto de Investigación de la Viña y el Vino” in the  
481 “Universidad de León” for providing the *Streptomyces* sp. strains. M.P. Martínez-Diz was  
482 supported by the FPI-INIA program from the INIA. D. Gramaje was supported by the Ramón  
483 y Cajal program, Spanish Government (RYC-2017-23098).

483

## 484 REFERENCES

485

- 486 1 Gramaje D, Urbez-Torres JR and Sosnowski MR, Managing grapevine trunk diseases with  
487 respect to etiology and epidemiology: current strategies and future prospects. *Plant Dis*  
488 **102**:12-39 (2018).
- 489 2 Halleen F, Fourie, PH and Crous PW, A review of black foot disease of grapevine.  
490 *Phytopathol Mediterr* **45**:S55-67 (2006).
- 491 3 Gramaje D and Armengol J, Fungal trunk pathogens in the grapevine propagation process:  
492 potential inoculum sources, detection, identification, and management strategies. *Plant*  
493 *Dis* **95**:1040-1055 (2011).
- 494 4 Agustí-Brisach C and Armengol J, Black-foot disease of grapevine: an update on taxonomy,  
495 epidemiology and management strategies. *Phytopathol Mediterr* **52**:245-261 (2013).

- 495 5 Martínez-Diz MP, Díaz-Losada E, Barajas E, Ruano-Rosa D, Andrés-Sodupe and Gramaje  
496 D, Screening of Spanish *Vitis vinifera* germplasm for resistance to *Phaeomoniella*  
497 *chlamydospora*. *Scient Hort* **246**:104-109 (2019a).
- 498 6 Aigoun-Mouhous W, Elena G, Cabral A, León M, Sabaou N, Armengol J, Chaouia C,  
499 Mahamedi AE and Berraf-Tebbal A, Characterization and pathogenicity of  
500 *Cylindrocarpon*-like asexual morphs associated with black foot disease in Algerian  
501 grapevine nurseries, with the description of *Pleiotheca algeriense* sp. nov. *Eur J Plant*  
502 *Pathol* **154**:887-901 (2019).
- 503 7 Lawrence DP, Nouri MT and Trouillas FP, Taxonomy and multi-locus phylogeny of  
504 cylindrocarpon-like species associated with diseased roots of grapevine and other fruit and  
505 nut crops in California. *FUSE* **4**:59-75 (2019).
- 506 8 Berlanas C, Ojeda S, López-Manzanares B, Andrés-Sodupe B, Bujanda R, Martínez-Diz MP,  
507 Díaz-Losada E and Gramaje D, Occurrence and diversity of black-foot disease fungi in  
508 symptomless grapevine nursery stock in Spain. *Plant Dis* **104**:94-104 (2020).
- 509 9 Reis P, Cabral A, Nascimento T, Oliveira H and Rego C, Diversity of *Ilyonectria* species in  
510 a young vineyard affected by black foot disease. *Phytopathol Mediterr* **52**:335-346 (2013).
- 511 10 Berlanas C, López-Manzanares B and Gramaje D, Estimation of viable propagules of black-  
512 foot disease pathogens in grapevine cultivated soils and their relation to production  
513 systems and soil properties. *Plant Soil* **417**:467-479 (2017).
- 514 11 Carlucci A, Lops F, Mostert L, Halleen F and Raimondo, ML, Occurrence fungi causing  
515 black foot on young grapevines and nursery rootstock plants in Italy. *Phytopathol Mediterr*  
516 **56**:10-39 (2017).
- 517 12 Petit E, Barriault E, Baumgartner E, Wilcox WF and Rolshausen PE, *Cylindrocarpon*  
518 species associated with black-foot of grapevine in northeastern United States and  
519 southeastern Canada. *Am J Enol Viticult* **62**:177-183 (2011).
- 520 13 Mostert L, Groenewald JZ, Summerbell RC, Gams W and Crous PW, Taxonomy and  
521 pathology of *Togninia* (*Diaporthales*) and its *Phaeoacremonium* anamorphs. *Stud Mycol*  
522 **54**:1-113 (2006).
- 523 14 Gramaje D, Mostert L and Armengol J, Characterization of *Cadophora luteo-olivacea* and  
524 *C. melinii* isolates obtained from grapevines and environmental samples from grapevine  
525 nurseries in Spain. *Phytopathol Mediterr* **50**:S112-S126 (2011).
- 526 15 Gubler WD, Rooney-Latham S, Vasquez SJ and Eskalen A, Esca (Black Measles) and Petri  
527 disease, in Grape Pest Management, Third Edition, ed. by Bettiga LJ, University of  
528 California, Agriculture and Natural Resources, Oakland, CA, Publication 3343. pp. 120-  
529 126 (2013).
- 530 16 Gramaje D, Mostert L, Groenewald JZ and Crous PW, *Phaeoacremonium*: from esca disease  
531 to phaeohyphomycosis. *Fungal Biol* **119**:759-783 (2015).
- 532 17 Martínez-Diz MP, Andrés-Sodupe M, Bujanda R, Díaz-Losada E, Eichmeier A and Gramaje  
533 D, Soil-plant compartments affect fungal microbiome diversity and composition in  
534 grapevine. *Fungal Ecol* **41**:234-244 (2019b).
- 535 18 Mondello V, Songy A, Battiston E, Pinto C, Coppin C, Trostel-Aziz P and Fontaine F,  
536 Grapevine trunk diseases: a review of fifteen years of trials for their control with chemicals  
537 and biocontrol agents. *Plant Dis* **7**:1189-1217 (2018).
- 538 19 Larignon P, Darné G, Ménard E, Desaché F and Dubos B, Comment agissait l'arsénite de  
539 sodium sur l'esca de la vigne? *Prog Agric Vitic* **125**:642-651 (2008).
- 540 20 Spinosi J, Févotte J and Vial G, Éléments techniques sur l'exposition professionnelle aux  
541 pesticides arsenicaux. Matrice cultures - expositions aux pesticides arsenicaux. Institut de  
542 veille sanitaire, Saint-Maurice, France (2009).
- 543 21 Halleen F and Fourie P, 2016. An integrated strategy for the proactive management of  
544 grapevine trunk disease pathogen infections in grapevine nurseries. *S Afr J Enol and Vitic*

- 545           **37**:104-114.
- 546 22 Fourie PH, Halleen F, van der Vyver J and Schrueder W, Effect of *Trichoderma* treatments  
547       on the occurrence of decline pathogens on the roots and rootstocks of nursery plants.  
548       *Phytopathol Mediterr* **40S**, 473-478 (2001).
- 549 23 Di Marco S, Osti F and Cesari A, Experiments on the control of Esca by *Trichoderma*.  
550       *Phytopathol Mediterr* **43**:108-115 (2004).
- 551 24 Fourie PH and Halleen F, Proactive control of Petri disease of grapevine through treatment  
552       of propagation material. *Plant Dis* **88**:1241-1245 (2004).
- 553 25 Fourie PH and Halleen F, Chemical and biological protection of grapevine propagation  
554       material from trunk disease pathogens. *Eur J Plant Path* **116**:255-265 (2006).
- 555 26 Petit E and Gubler WD, Influence of *Glomus intraradices* on black foot disease caused by  
556       *Cylindrocarpon macrodidymum* on *Vitis rupestris* under controlled conditions. *Plant Dis*  
557       **90**:1481-1484 (2006).
- 558 27 Mutawila C, Fourie PH, Halleen F and Mostert L, Grapevine cultivar variation to pruning  
559       wound protection by *Trichoderma* species against trunk pathogens. *Phytopathol Mediterr*  
560       **50**:S264-S276 (2011).
- 561 28 Pertot I, Prodorutti D, Colombini A and Pasini L, *Trichoderma atroviride* SC1 prevents  
562       *Phaeomoniella chlamydospora* and *Phaeoacremonium aleophilum* infection of grapevine  
563       plants during the grafting process in nurseries. *Biocontrol* **61**:257-267 (2016).
- 564 29 Santos RF, Heckler LI, Lazarotto M, Garrido LR, Rego C and Blume E, *Trichoderma* spp.  
565       and *Bacillus subtilis* for control of *Dactylonectria macrodidyma* in grapevine. *Phytopathol*  
566       *Mediterr* **55**:293-300 (2016).
- 567 30 Berlanas C, Andrés-Sodupe M, López-Manzanares B, Maldonado-González MM and  
568       Gramaje D, Effect of white mustard cover crop residue, soil chemical fumigation and  
569       *Trichoderma* spp. root treatment on black-foot disease control in grapevine. *Pest Manag*  
570       *Sci* **74**:2864-2873 (2018).
- 571 31 Del Frari G, Cabral A, Nascimento T, Boavida Ferreira R and Oliveira H, *Epicoccum*  
572       *layuense* a potential biological control agent of esca-associated fungi in grapevine. *PLoS*  
573       *ONE* **14**:e0213273 (2019).
- 574 32 Mondello V, Spagnolo A, Larignon P, Clément C and Fontaine F, Phytoprotection potential  
575       of *Fusarium proliferatum* for control of *Botryosphaeria dieback* pathogens in grapevine.  
576       *Phytopathol Mediterr* **58**:293-306 (2019).
- 577 33 Berbegal M, Ramón-Albalat A, León M and Armengol J, Evaluation of long-term protection  
578       from nursery to vineyard provided by *Trichoderma atroviride* SC1 against fungal  
579       grapevine trunk pathogens. *Pest Manag Sci* **76**:967-977 (2020).
- 580 34 Alfonso A, Conigliaro G, Torta L, Burrzano S and Moschetti G, Antagonism of *Bacillus*  
581       *subtilis* strain AG1 against vine wood fungal pathogens. *Phytopathol Mediterr* **48**:155-158  
582       (2009).
- 583 35 Haidar R, Deschamps A, Roudet J, Calvo-Garrido C, Bruez E, Rey and Fermaud M, Multi-  
584       organ screening of efficient bacterial control agents against two major pathogens of  
585       grapevine. *Biol Control* **92**:55-65 (2016a).
- 586 36 Haidar R, Roudet J, Bonnard O, Dufour M, Corio-Costet M, Fert M, Gautier T, Deschamps  
587       A and Fermaud M, Screening and modes of action of antagonistic bacteria to control the  
588       fungal pathogen *Phaeomoniella chlamydospora* involved in grapevine trunk diseases.  
589       *Microbiol Res* **192**:172-184 (2016b).
- 590 37 Rezgui A, Ben Ghnaya-Chakroun A, Vallance J, Bruez E, Hajlaoui MR, Sadfi-Zouaoui N  
591       and Rey P, Endophytic bacteria with antagonistic traits inhabit the wood tissues of  
592       grapevines from Tunisian vineyards. *Biol Control* **99**:28-37 (2016).
- 593 38 Álvarez-Pérez JM, González-García S, Cobos R, Olego MA, Ibañez A, Díez-Galán A,  
594       Garzón-Jimeno E and Coque JJR, Use of endophytic and rhizospheric actinobacteria from

- 595 grapevine plants to reduce nursery fungal infections that lead to young grapevine decline.  
596 *Appl Environ Microb* **83**:e01564-17 (2017).
- 597 39 Andreolli M, Zapparoli G, Angelini E, Lucchetta G, Silvia Lampis S and Vallini G,  
598 *Pseudomonas protegens* MP12: A plant growth-promoting endophytic bacterium with  
599 broad-spectrum antifungal activity against grapevine phytopathogens. *Microbiol Res*  
600 **219**:123-131 (2019).
- 601 40 Trotel-Aziz P, Abou-Mansour E, Courteaux B, Rabenoelina F, Clément C, Fontaine F and  
602 Aziz A, *Bacillus subtilis* PTA-271 Counteracts Botryosphaeria Dieback in Grapevine,  
603 Triggering Immune Responses and Detoxification of Fungal Phytotoxins. *Front Plant Sci*  
604 **10**:25 (2019).
- 605 41 Yacoub A, Gerbore J, Magnin N, Chambon P, Dufour MC, Corio-Costet MF, Guyoneaud R  
606 and Rey P, Ability of *Pythium oligandrum* strains to protect *Vitis vinifera* L., by inducing  
607 plant resistance against *Phaeoemoniella chlamydospora*, a pathogen involved in Esca, a  
608 grapevine trunk disease. *Biol Control* **92**:7-16 (2016).
- 609 42 Daraignes L, Gerbore J, Yacoub A, Dubois L, Romand C, Zekri O, Roudet J, Chambon P  
610 and Fermaud M, Efficacy of *P. oligandrum* affected by its association with bacterial BCAs  
611 and rootstock effect in controlling grapevine trunk diseases. *Biol Control* **119**:59-67  
612 (2018).
- 613 43 MAPA, Official Registry of Phytosanitary Products, Ministerio de Agricultura, Pesca y  
614 Alimentación, Consulted on 13 January 2020 from  
615 [https://www.mapa.gob.es/es/agricultura/temas/sanidad-vegetal/productos-](https://www.mapa.gob.es/es/agricultura/temas/sanidad-vegetal/productos-fitosanitarios/registro/menu.asp)  
616 [fitosanitarios/registro/menu.asp](https://www.mapa.gob.es/es/agricultura/temas/sanidad-vegetal/productos-fitosanitarios/registro/menu.asp), Spain (2020).
- 617 44 Gramaje D, Alaniz S, Abad-Campos P, García-Jiménez J and Armengol J, Effect of hot-  
618 water treatments in vitro on conidial germination and mycelial growth of grapevine trunk  
619 pathogens. *Ann Appl Biol* **156**:231-241 (2010).
- 620 45 Eichmeier A, Pecenka J, Penázová E, Baránek M, Català-García S, León M, Armengol J  
621 and Gramaje D, High-throughput amplicon sequencing-based analysis of active fungal  
622 communities inhabiting grapevine after hot-water treatments reveals unexpectedly high  
623 fungal diversity. *Fungal Ecol* **36**:26-38 (2018).
- 624 46 Dhingra O and Sinclair JB, Basic Plant Pathology Methods, CRC Press, Boca Raton, FL, p.  
625 434 (1995).
- 626 47 Crous PW, Groenewald JZ, Risede JM and Hywel-Jones NL, *Calonectria* species and their  
627 *Cylindrocladium* anamorphs: Species with sphaeropedunculate vesicles. *Stud Mycol*  
628 **50**:415-429 (2004).
- 629 48 Cabral A, Groenewald JZ, Rego C, Oliveira H and Crous PW, Cylindrocarpon root rot:  
630 Multi-gene analysis reveals novel species within the *Ilyonectria radicicola* species  
631 complex. *Mycol Progr* **11**:655–688 (2012a).
- 632 49 Cabral A, Rego C, Nascimento T, Oliveira H, Groenewald JZ and Crous PW, Multi-gene  
633 analysis and morphology reveal a novel *Ilyonectria* species associated with black foot  
634 disease of grapevines. *Fungal Biol* **116**:62-80 (2012b).
- 635 50 Tegli S, Bertelli E and Surico G, Sequence analysis of ITS ribosomal DNA in five  
636 *Phaeoacremonium* species and development of a PCR-based assay for the detection of *P.*  
637 *chlamydosporum* and *P. aleophilum* in grapevine tissue. *Phytopathol Mediterr* **39**:134-149  
638 (2000).
- 639 51 O'Donnell K and Cigelnik E, Two divergent intragenomic rDNA ITS2 types within a  
640 monophyletic lineage of the fungus *Fusarium* are nonorthologous. *Mol Phylogenet Evol*  
641 **7**:103-116 (1997).
- 642 52 Glass NL and Donaldson G, Development of primer sets designed for use with PCR to  
643 amplify conserved genes from filamentous ascomycetes. *Appl Environ Microbiol* **61**:  
644 1323-1330 (1995).

- 645 53 Travadon R, Lawrence DP, Rooney-Latham S, Gubler WD, Wilcox WF, Rolshausen PE and  
646 Baumgartner K, *Cadophora* species associated with wood-decay of grapevine in North  
647 America. *Fungal Biol* **119**:53-66 (2015).
- 648 54 Gardes M and Bruns TD, ITS primers with enhanced specificity for Basidiomycetes:  
649 application to the identification of mycorrhizae and rusts. *Mol Ecol* **2**:113-118 (1993).
- 650 55 Nelson DW and Sommers LE, Total carbon, organic carbon, and organic matter, in Methods  
651 of Soil Analysis Part 2, Second Edition, ed. by Page AL, American Society of Agronomy,  
652 Soil Science Society of America, Madison, WI, pp. 539-594 (1982).
- 653 56 Orsini L and Remy JC, Utilisation du chlorure de cobaltihexammine pour la determina-tion  
654 simultanée de la capacité d'échange et des bases échangeables des sols. *Scie Sol* **4**:269-  
655 275 (1976).
- 656 57 Mehlich A, Mehlich 3 soil test extractant: a modification of Mehlich 2 extractant. *Commun*  
657 *Soil Sci Plant Anal* **15**:1409-1416 (1984).
- 658 58 Vannacci G and Gullino ML, Use of biocontrol agents against soil-borne pathogens: results  
659 and limitations. *Acta Hortic* **532**:79-88 (2000).
- 660 59 Compant S, Duffy B, Nowak J, Clément C and Barka EA, Use of plant growth-promoting  
661 bacteria for biocontrol of plant diseases: principles, mechanisms of action, and future  
662 prospects. *Appl Environ Microbiol* **71**:4951-4959 (2005).
- 663 60 Zhang X, Li B, Wang Y, Guo Q, Lu X, Li S and Ma P, Lipopeptides, a novel protein, and  
664 volatile compounds contribute to the antifungal activity of the biocontrol agent *Bacillus*  
665 *atrophaeus* CAB-1. *Appl Microbiol Biotechnol* **97**:9525-9534 (2013).
- 666 61 Guardado-Valdivia L, Tovar-Pérez E, Chacón-López A, López-García U, Gutiérrez-  
667 Martínez P, Stoll A and Aguilera S, Identification and characterization of a new *Bacillus*  
668 *atrophaeus* strain B5 as biocontrol agent of postharvest anthracnose disease in soursop  
669 (*Annona muricata*) and avocado (*Persea americana*). *Microbiol Res* **210**:26-32 (2018).
- 670 62 Ma J, Wang C, Wang H, Liu K, Zhang T, Yao L, Zhao Z, Du B and Ding Y, Analysis of the  
671 Complete Genome Sequence of *Bacillus atrophaeus* GQJK17 Reveals Its Biocontrol  
672 Characteristics as a Plant Growth-Promoting Rhizobacterium. *Biomed Res Int*  
673 **2018**:9473542 (2018).
- 674 63 Trotel-Aziz P, Couderchet M, Biagianti S and Aziz A, Characterization of new bacterial  
675 biocontrol agents *Acinetobacter*, *Bacillus*, *Pantoea* and *Pseudomonas* spp. mediating  
676 grapevine resistance against *Botrytis cinerea*. *Environ Exp Bot* **64**:21-32 (2008).
- 677 64 Lakkis S, Trotel-Aziz P, Rabenoelina F, Schwarzenberg A, Nguema-Ona E, Clément C and  
678 Aziz A, Strengthening Grapevine Resistance by *Pseudomonas fluorescens* PTA-CT2  
679 Relies on Distinct Defense Pathways in Susceptible and Partially Resistant Genotypes to  
680 Downy Mildew and Gray Mold Diseases. *Front Plant Sci* **10**:1112 (2019).
- 681 65 Compant S, Brader G, Muzammil S, Sessitsch A, Lebrhi A and Mathieu F, Use of beneficial  
682 bacteria and their secondary metabolites to control grapevine pathogen diseases.  
683 *BioControl* **58**:435-455 (2013).
- 684 66 Compant S and Mathieu F, Biocontrol of major grapevine diseases: leading research, CABI,  
685 Wallingford, UK, pp. 160-170 (2017).
- 686 67 Howell CR, Hanson LE, Stipanovic RD and Puckhaber LS, Induction of Terpenoid  
687 Synthesis in Cotton Roots and Control of *Rhizoctonia solani* by Seed Treatment with  
688 *Trichoderma virens*. *Phytopathology* **90**:248-252 (2000).
- 689 68 Gava CAT and Pinto JM, Biocontrol of melon wilt caused by *Fusarium oxysporum* Schlect  
690 f. sp. *melonis* using seed treatment with *Trichoderma* spp. and liquid compost. *Biol*  
691 *Control* **97**:13-20 (2016).
- 692 69 Hirpara DG, Gajera HP, Hirapara JG and Golakiya BA, Inhibition coefficient and molecular  
693 diversity of multi stress tolerant *Trichoderma* as potential biocontrol agent against  
694 *Sclerotium rolfsii* Sacc. *Infect Genet Evol* **55**:75-92 (2017).

- 695 70 Berger H, Yacoub A, Gerbore J, Grizard D, Rey P, Sessitsch A and Compant S, Draft  
696 Genome Sequence of Biocontrol Agent *Pythium oligandrum* Strain Po37, an Oomycota.  
697 *Genome Announc* **4**:e00215-16 (2016).
- 698 71 Yacoub A, Gerbore J, Magnin N, Haidar R, Compant S and Rey P, Transcriptional analysis  
699 of the interaction between the oomycete biocontrol agent, *Pythium oligandrum*, and the  
700 roots of *Vitis vinifera* L. *Biol Control* **120**:26-35 (2018).
- 701 72 González-García S, Álvarez-Pérez JM, Sáenz de Miera LE, Cobos R, Ibáñez A, Díez-Galán  
702 A, Garzón-Jimeno E and Coque JJR, Developing tools for evaluating inoculation methods  
703 of biocontrol *Streptomyces* sp. strains into grapevine plants. *PLoS ONE* **14**:e0211225  
704 (2019).
- 705 73 Van Jaarsveld W, Stempien E, Pierron R, Hallen F and Mostert L, An overview of lessons  
706 learnt in the application of *Trichoderma* products in grapevine nurseries. *Phytopathol*  
707 *Mediterr* **58**:423. (2019).
- 708 74 Halleen F, Fourie PH and Crous PW, Control of black foot disease in grapevine nurseries.  
709 *Plant Pathol* **56**:637-645 (2007).
- 710 75 Kaur T, Rani R and Manhas RK, Biocontrol and plant growth promoting potential of  
711 phylogenetically new *Streptomyces* sp. MR14 of rhizospheric origin. *AMB Express* **9**:125  
712 (2019).
- 713 76 Suárez-Moreno ZR, Vinchira-Villarraga DM, Vergara-Morales DI, Castellanos L, Ramos  
714 FA, Guarnaccia C, Degrassi G, Venturi V and Moreno-Sarmiento N, Plant-Growth  
715 Promotion and Biocontrol Properties of Three *Streptomyces* spp. Isolates to Control  
716 Bacterial Rice Pathogens. *Front Microbiol* **10**:290 (2019).
- 717 77 Benitez T, Rincon AM, Limon MC and Codon AC, Biocontrol mechanisms of *Trichoderma*  
718 strains. *Int Microbiol* **7**:249-260 (2004).
- 719 78 Harman GE, Howell CR, Viterbo A, Chet I and Lorito M, *Trichoderma* species-  
720 opportunistic, a virulent plant symbionts. *Nat Rev* **2**:43-56 (2004).

**Table 1.** Effects of variables on disease incidence (DI) and disease severity (DS) in roots and basal ends of rootstock of grapevine grafted plants.

| Petri disease      | 2-year-old plants |                 |                             |         |                | 3-year-old plants |         |                |         |                |
|--------------------|-------------------|-----------------|-----------------------------|---------|----------------|-------------------|---------|----------------|---------|----------------|
|                    | DI (%)            |                 |                             | DS (%)  |                | DI (%)            |         |                | DS (%)  |                |
|                    | df <sup>a</sup>   | MS <sup>b</sup> | <i>P</i> value <sup>c</sup> | MS      | <i>P</i> value | df                | MS      | <i>P</i> value | MS      | <i>P</i> value |
| Roots              |                   |                 |                             |         |                |                   |         |                |         |                |
| Block              | 3                 | 0.0034          | 0.9920                      | 0.0129  | 0.8115         | 3                 | 0.0036  | 0.5770         | 0.0332  | 0.9112         |
| Treatment          | 5                 | 0.0162          | 0.0003                      | 0.0196  | 0.2107         | 5                 | 0.0202  | 0.0010         | 0.0708  | 0.0418         |
| Error              | 63                | 0.0029          |                             | 0.0133  |                | 63                | 0.0042  |                | 2.1901  |                |
| Basal ends         |                   |                 |                             |         |                |                   |         |                |         |                |
| Block              | 3                 | 0.03102         | 0.7304                      | 0.01033 | 0.9031         | 3                 | 0.03008 | 0.4951         | 0.02974 | 0.9954         |
| Treatment          | 5                 | 0.03810         | 0.0411                      | 0.00806 | 0.0397         | 5                 | 0.03400 | 0.0433         | 0.01761 | 0.0462         |
| Error              | 63                | 0.01686         |                             | 0.01890 |                | 63                | 0.01770 |                | 0.02023 |                |
| Black-foot disease | 2-year-old plants |                 |                             |         |                | 3-year-old plants |         |                |         |                |
|                    | DI (%)            |                 |                             | DS (%)  |                | DI (%)            |         |                | DS (%)  |                |
|                    | df                | MS              | <i>P</i> value              | MS      | <i>P</i> value | df                | MS      | <i>P</i> value | MS      | <i>P</i> value |
| Roots              |                   |                 |                             |         |                |                   |         |                |         |                |
| Block              | 3                 | 0.0141          | 0.9945                      | 0.0071  | 0.9110         | 3                 | 0.1212  | 0.9932         | 0.0448  | 0.8234         |
| Treatment          | 5                 | 0.0024          | 0.9973                      | 0.0121  | 0.7817         | 5                 | 0.0082  | 0.9162         | 0.0044  | 0.0526         |
| Error              | 63                | 0.0393          |                             | 0.0247  |                | 63                | 0.0282  |                | 0.0467  |                |
| Basal ends         |                   |                 |                             |         |                |                   |         |                |         |                |
| Block              | 3                 | 0.0076          | 0.8712                      | 0.0081  | 0.7883         | 3                 | 0.0135  | 0.9003         | 0.0328  | 0.9991         |
| Treatment          | 5                 | 0.0282          | 0.0413                      | 0.0328  | 0.0417         | 5                 | 0.0167  | 0.0389         | 0.0151  | 0.9404         |
| Error              | 63                | 0.0136          |                             | 0.0501  |                | 63                | 0.0233  |                | 0.0613  |                |

<sup>a</sup> df = degrees of freedom.<sup>b</sup> MS = mean square.<sup>c</sup> Significance level  $P < 0.05$ .



**Table 2.** Mean disease incidence (DI) and severity (DS) of Petri disease pathogens isolated from the roots and basal ends of the rootstock of 2-year-old and 3-year-old grafted plants subjected to various treatments prior to planting in two fields in Logroño (La Rioja).

| <b><i>Cadophora luteo-olivacea</i></b>                          |                     |            |                     |            |                   |            |        |            |            |
|-----------------------------------------------------------------|---------------------|------------|---------------------|------------|-------------------|------------|--------|------------|------------|
|                                                                 | 2-year-old plants   |            |                     |            | 3-year-old plants |            |        |            |            |
|                                                                 | DI (%) <sup>a</sup> |            | DS (%) <sup>a</sup> |            | DI (%)            |            | DS (%) |            |            |
|                                                                 | Roots               | Basal ends | Roots               | Basal ends | Roots             | Basal ends | Roots  | Basal ends | Basal ends |
| T1. <i>Streptomyces</i> sp. E1 + R4                             | 8.1 a               | 24.4 ab    | 20.4 a              | 26.7 a     | 6.9 a             | 25.6 a     | 19.4 a | 31.3 a     |            |
| T2. <i>Trichoderma koningii</i> TK7                             | 5.6 ab              | 34.4 a     | 20.4 a              | 24.5 a     | 5.6 a             | 34.4 a     | 19.6 a | 28.4 a     |            |
| T3. <i>Trichoderma atroviride</i> SC1                           | 6.9 ab              | 20.6 b     | 21.0 a              | 30.3 a     | 5.0 a             | 28.1 a     | 19.2 a | 27.6 a     |            |
| T4. <i>Pseudomonas fluorescens</i> + <i>Bacillus atrophaeus</i> | 6.3 ab              | 31.3 ab    | 22.3 a              | 30.7 a     | 6.3 a             | 31.3 a     | 20.4 a | 35.0 a     |            |
| T5. <i>Pythium oligandrum</i> Po37                              | 3.8 b               | 31.9 ab    | 21.3 a              | 30.3 a     | 5.0 a             | 31.9 a     | 17.5 a | 31.0 a     |            |
| Control (C)                                                     | 7.5 a               | 38.1 a     | 25.2 a              | 33.8 a     | 7.5 a             | 36.9 a     | 22.3 a | 33.4 a     |            |
| LSD ( $P = 0.05$ )                                              | 2.7                 | 8.2        | 7.5                 | 7.7        | 2.5               | 7.8        | 7.0    | 7.5        |            |
| <b><i>Phaeoconiella chlamydospora</i></b>                       |                     |            |                     |            |                   |            |        |            |            |
|                                                                 | 2-year-old plants   |            |                     |            | 3-year-old plants |            |        |            |            |
|                                                                 | DI (%)              |            | DS (%)              |            | DI (%)            |            | DS (%) |            |            |
|                                                                 | Roots               | Basal ends | Roots               | Basal ends | Roots             | Basal ends | Roots  | Basal ends | Basal ends |
| T1. <i>Streptomyces</i> sp. E1 + R4                             | 6.3 a               | 11.3 a     | 10.0 ab             | 27.6 a     | 7.5 a             | 15.6 a     | 9.2 a  | 28.2 ab    |            |
| T2. <i>Trichoderma koningii</i> TK7                             | 6.3 a               | 18.8 a     | 10.6 ab             | 25.0 a     | 8.1 a             | 18.8 a     | 14.2 a | 35.0 a     |            |
| T3. <i>Trichoderma atroviride</i> SC1                           | 7.5 a               | 14.4 a     | 14.8 ab             | 29.8 a     | 8.1 a             | 6.3 b      | 15.8 a | 15.0 b     |            |
| T4. <i>Pseudomonas fluorescens</i> + <i>Bacillus atrophaeus</i> | 6.3 a               | 17.5 a     | 13.3 ab             | 28.5 a     | 7.5 a             | 17.5 a     | 11.7 a | 38.7 a     |            |
| T5. <i>Pythium oligandrum</i> Po37                              | 1.9 b               | 22.5 a     | 7.5 b               | 20.9 a     | 0.6 b             | 22.5 a     | 12.5 a | 31.0 a     |            |
| Control (C)                                                     | 9.4 a               | 20.6 a     | 15.4 a              | 28.3 a     | 9.4 a             | 20.6 a     | 10.6 a | 34.6 a     |            |
| LSD ( $P = 0.05$ )                                              | 3.1                 | 5.5        | 3.6                 | 7.4        | 3.3               | 3.8        | 3.8    | 7.1        |            |
| <b><i>Phaeoacremonium minimum</i></b>                           |                     |            |                     |            |                   |            |        |            |            |
|                                                                 | 2-year-old plants   |            |                     |            | 3-year-old plants |            |        |            |            |
|                                                                 | DI (%)              |            | DS (%)              |            | DI (%)            |            | DS (%) |            |            |
|                                                                 | Roots               | Basal ends | Roots               | Basal ends | Roots             | Basal ends | Roots  | Basal ends | Basal ends |
| T1. <i>Streptomyces</i> sp. E1 + R4                             | 4.4 ab              | 11.3 a     | 16.3 a              | 15.1 a     | 4.0 a             | 15.0 a     | 13.8 a | 21.0 a     |            |
| T2. <i>Trichoderma koningii</i> TK7                             | 3.1 b               | 16.9 a     | 18.8 a              | 13.6 a     | 4.1 a             | 16.5 a     | 2.5 b  | 9.5 b      |            |
| T3. <i>Trichoderma atroviride</i> SC1                           | 5.0 ab              | 11.3 a     | 7.1 b               | 11.8 a     | 3.9 a             | 14.7 a     | 3.8 b  | 22.4 a     |            |
| T4. <i>Pseudomonas fluorescens</i> + <i>Bacillus atrophaeus</i> | 3.1 b               | 17.5 a     | 23.8 a              | 12.8 a     | 4.3 a             | 15.1 a     | 15.0 a | 17.7 ab    |            |
| T5. <i>Pythium oligandrum</i> Po37                              | 3.8 ab              | 16.9 a     | 16.3 a              | 10.3 a     | 4.0 a             | 15.8 a     | 12.5 a | 18.3 ab    |            |
| Control (C)                                                     | 5.6 a               | 16.9 a     | 21.7 a              | 17.0 a     | 4.0 a             | 17.2 a     | 12.5 a | 19.9 ab    |            |
| LSD ( $P = 0.05$ )                                              | 2.3                 | 3.6        | 3.5                 | 3.3        | 2.7               | 3.1        | 3.6    | 3.5        |            |

<sup>a</sup> At each plant part, percentages of disease incidence (DI) and disease severity (DS) are the mean of 160 plants analyzed (40 plants per replicate). Values in the same column followed by the same letter do not differ significantly ( $P=0.05$ ).

**Table 3.** Mean disease incidence (DI) and severity (DS) of the most prevalent black-foot disease pathogens isolated from the roots and basal ends of rootstock of 2-year-old and 3-year-old grafted plants subjected to various treatments prior to planting in two fields in Logroño (La Rioja).

| <b><i>Dactylonectria torresensis</i></b>                        |                     |            |                     |            |                   |            |        |            |            |
|-----------------------------------------------------------------|---------------------|------------|---------------------|------------|-------------------|------------|--------|------------|------------|
|                                                                 | 2-year-old plants   |            |                     |            | 3-year-old plants |            |        |            |            |
|                                                                 | DI (%) <sup>a</sup> |            | DS (%) <sup>a</sup> |            | DI (%)            |            | DS (%) |            |            |
|                                                                 | Roots               | Basal ends | Roots               | Basal ends | Roots             | Basal ends | Roots  | Basal ends | Basal ends |
| T1. <i>Streptomyces</i> sp. E1 + R4                             | 31.3 a              | 6.3 b      | 20.5 a              | 3.8 b      | 21.3 a            | 1.3 b      | 12.3 a | 20.0 a     |            |
| T2. <i>Trichoderma koningii</i> TK7                             | 30.0 a              | 6.3 b      | 15.3 a              | 22.1 a     | 26.9 a            | 10.0 a     | 13.5 a | 19.7 a     |            |
| T3. <i>Trichoderma atroviride</i> SC1                           | 25.0 a              | 5.0 b      | 23.0 a              | 17.5 a     | 21.9 a            | 14.4 a     | 13.8 a | 16.7 a     |            |
| T4. <i>Pseudomonas fluorescens</i> + <i>Bacillus atrophaeus</i> | 31.3 a              | 4.4 b      | 18.5 a              | 22.5 a     | 26.9 a            | 10.0 a     | 10.8 a | 18.3 a     |            |
| T5. <i>Pythium oligandrum</i> Po37                              | 25.0 a              | 3.8 b      | 17.6 a              | 28.3 a     | 30.6 a            | 12.5 a     | 10.0 a | 20.5 a     |            |
| Control (C)                                                     | 25.0 a              | 14.4 a     | 20.6 a              | 18.1 a     | 20.6 a            | 11.9 a     | 11.5 a | 19.9 a     |            |
| LSD ( $P = 0.05$ )                                              | 6.6                 | 6.2        | 6.0                 | 6.5        | 5.8               | 3.8        | 3.2    | 3.5        |            |
| <b><i>Dactylonectria macrodidyma</i></b>                        |                     |            |                     |            |                   |            |        |            |            |
|                                                                 | 2-year-old plants   |            |                     |            | 3-year-old plants |            |        |            |            |
|                                                                 | DI (%)              |            | DS (%)              |            | DI (%)            |            | DS (%) |            |            |
|                                                                 | Roots               | Basal ends | Roots               | Basal ends | Roots             | Basal ends | Roots  | Basal ends | Basal ends |
| T1. <i>Streptomyces</i> sp. E1 + R4                             | 8.8 b               | 2.5 b      | 16.3 a              | 0 b        | 3.6 b             | 3.8 a      | 5.8 a  | 0 b        |            |
| T2. <i>Trichoderma koningii</i> TK7                             | 9.4 ab              | 3.1 b      | 17.8 a              | 3.8 ab     | 10.6 a            | 3.1 a      | 4.8 a  | 3.3 ab     |            |
| T3. <i>Trichoderma atroviride</i> SC1                           | 11.3 ab             | 1.3 b      | 18.8 a              | 2.5 ab     | 7.5 a             | 3.8 a      | 4.1 a  | 0 b        |            |
| T4. <i>Pseudomonas fluorescens</i> + <i>Bacillus atrophaeus</i> | 13.8 ab             | 1.3 b      | 18.5 a              | 2.5 ab     | 10.0 a            | 4.4 a      | 5.1 a  | 2.5 ab     |            |
| T5. <i>Pythium oligandrum</i> Po37                              | 16.9 ab             | 3.8 b      | 11.8 a              | 1.7 ab     | 9.4 a             | 3.1 a      | 4.2 a  | 5.0 ab     |            |
| Control (C)                                                     | 16.3 a              | 10.0 a     | 14.8 a              | 6.1 a      | 8.8 a             | 3.8 a      | 4.0 a  | 6.3 a      |            |
| LSD ( $P = 0.05$ )                                              | 3.6                 | 3.3        | 3.7                 | 2.3        | 3.0               | 2.5        | 2.6    | 2.3        |            |
| <b><i>Ilyonectria liriodendri</i></b>                           |                     |            |                     |            |                   |            |        |            |            |
|                                                                 | 2-year-old plants   |            |                     |            | 3-year-old plants |            |        |            |            |
|                                                                 | DI (%)              |            | DS (%)              |            | DI (%)            |            | DS (%) |            |            |
|                                                                 | Roots               | Basal ends | Roots               | Basal ends | Roots             | Basal ends | Roots  | Basal ends | Basal ends |
| T1. <i>Streptomyces</i> sp. E1 + R4                             | 3.8 a               | 0.6 a      | 11.7 a              | 0 b        | 3.8 a             | 0.6 a      | 30.8 a | 5.0 a      |            |
| T2. <i>Trichoderma koningii</i> TK7                             | 2.5 a               | 1.9 a      | 12.5 a              | 6.3 ab     | 3.1 a             | 0.6 a      | 32.5 a | 2.5 a      |            |
| T3. <i>Trichoderma atroviride</i> SC1                           | 4.4 a               | 1.9 a      | 12.5 a              | 7.5 a      | 3.8 a             | 0.6 a      | 30.0 a | 5.0 a      |            |
| T4. <i>Pseudomonas fluorescens</i> + <i>Bacillus atrophaeus</i> | 2.5 a               | 0.6 a      | 16.3 a              | 2.5 ab     | 3.1 a             | 1.3 a      | 36.3 a | 5.0 a      |            |
| T5. <i>Pythium oligandrum</i> Po37                              | 2.5 a               | 1.3 a      | 12.5 a              | 7.5 a      | 3.1 a             | 0.6 a      | 28.8 a | 5.0 a      |            |
| Control (C)                                                     | 3.8 a               | 0.6 a      | 10.0 a              | 2.5 ab     | 2.5 a             | 0.6 a      | 30.0 a | 5.0 a      |            |
| LSD ( $P = 0.05$ )                                              | 2.5                 | 2.4        | 3.1                 | 2.9        | 2.5               | 2.2        | 7.1    | 2.5        |            |

<sup>a</sup> At each plant part, percentages of disease incidence (DI) and disease severity (DS) are the mean of 160 plants analyzed (40 plants per replicate). Values in the same column followed by the same letter do not differ significantly ( $P=0.05$ ).

**Table 4.** Pathogen reduction achieved by BCA treatments in the 3-year-old plants, associated with Petri and black-foot disease.

| <b>Petri disease</b>      |                                   |                          |                          |
|---------------------------|-----------------------------------|--------------------------|--------------------------|
| Plant part                | Biocontrol agent                  | Pathogen                 | Reduction <sup>a</sup>   |
| Roots                     | <i>Pythium oligandrum</i> Po37    | <i>Pa. chlamydospora</i> | 93.6% (DI <sup>b</sup> ) |
|                           | <i>Trichoderma koningii</i> TK7   | <i>Pm. minimum</i>       | 80% (DS <sup>c</sup> )   |
|                           | <i>Trichoderma atroviride</i> SC1 | <i>Pm. minimum</i>       | 69.6% (DS)               |
| Basal ends                | <i>Trichoderma atroviride</i> SC1 | <i>Pa. chlamydospora</i> | 69.4% (DI)<br>56.6% (DS) |
|                           | <i>Trichoderma koningii</i> TK7   | <i>Pm. minimum</i>       | 52.3% (DS)               |
| <b>Black-foot disease</b> |                                   |                          |                          |
| Basal ends                | <i>Streptomyces</i> sp. E1 + R4   | <i>D. torresensis</i>    | 89.1% (DI)               |
|                           | <i>Streptomyces</i> sp. E1 + R4   | <i>D. macrodidyma</i>    | 100% (DS)                |
|                           | <i>Trichoderma atroviride</i> SC1 | <i>D. macrodidyma</i>    | 100% (DS)                |

<sup>a</sup> The percentage of reduction (PR) of the pathogen detection at each plant part was calculated as  $PR = 100(PC - PT)/PC$ , where PC is the mean pathogen incidence or severity in the control and PT is the mean pathogen incidence or severity in the biocontrol agent treatment.

<sup>b</sup> Disease incidence

<sup>c</sup> Disease severity
